# Supplementary material for: A nucleation-tuned mechanism to prepare centre-crossed zeolite lamellas by the rotating/static switch crystallization strategy
Source: Royal Society of Chemistry journal article supplement (doi:10.1039/d1qi01394g), 2022-01-01
Supplement: d1qi01394g1.pdf [file d1qi01394g1.pdf]

## Supporting Information

**Table S1** Fraction of Q<sup>n</sup> Si population determined by quantitative data of solid-state

<sup>29</sup>Si MAS NMR spectra

| No. | Sample name                | Chemical shift range<br>(ppm) | (Q <sup>2</sup> +Q <sup>3</sup> )/Q <sup>n</sup><br>(%) | Q <sup>4</sup> /Q <sup>n</sup><br>(%) |
|-----|----------------------------|-------------------------------|---------------------------------------------------------|---------------------------------------|
| 1   | <i>R0.5</i>                | -80.0 ~ -127.4                | 64                                                      | 36                                    |
| 2   | <i>R0.5S5</i>              | -81.5 ~ -126.0                | 55                                                      | 45                                    |
| 3   | <i>R0.5S10 (or RS-160)</i> | -85.8 ~ -132.8                | 46                                                      | 54                                    |
| 4   | <i>RS-112</i>              | -89.4 ~ -122.7                | 45                                                      | 55                                    |
| 5   | <i>RS-28</i>               | -88.9 ~ -123.0                | 44                                                      | 56                                    |
| 6   | <i>R0.5S10-AT</i>          | -80.0 ~ -132.4                | 55                                                      | 45                                    |

**Table S2** TG analysis results of zeolite precursors and catalysts

| Sample           | 303~473 K<br>(%) | 473~823 K<br>(%) | 823~1073 K<br>(%) | Total weight loss<br>(303~1073 K) | Removal rates of PI<br>(%) |
|------------------|------------------|------------------|-------------------|-----------------------------------|----------------------------|
| <i>RS-28</i>     | 7.95             | 12.97            | 1.60              | 22.52                             |                            |
| <i>RS-28-AT</i>  | 9.56             | 5.34             | 1.27              | 16.17                             | 46.42                      |
| <i>RS-56</i>     | 5.21             | 12.77            | 1.85              | 19.83                             |                            |
| <i>RS-56-AT</i>  | 8.79             | 6.86             | 1.64              | 17.29                             | 58.82                      |
| <i>RS-112</i>    | 8.23             | 12.02            | 1.39              | 21.64                             |                            |
| <i>RS-112-AT</i> | 9.59             | 4.89             | 1.08              | 15.56                             | 59.35                      |
| <i>RS-140</i>    | 6.83             | 14.17            | 1.33              | 22.33                             |                            |
| <i>RS-140-AT</i> | 8.87             | 5.48             | 1.24              | 15.59                             | 61.32                      |
| <i>RS-160</i>    | 5.54             | 11.91            | 1.07              | 18.52                             |                            |
| <i>RS-160-AT</i> | 9.22             | 4.52             | 1.05              | 14.79                             | 62.05                      |

**Table S3** Textural properties of Fe<sub>2</sub>O<sub>3</sub> supported zeolite catalysts<sup>a</sup>

| Catalysts                                   | Total pore volume (cm <sup>3</sup> g <sup>-1</sup> ) | BET surface area (m <sup>2</sup> g <sup>-1</sup> ) | Exter. BET surface area (m <sup>2</sup> g <sup>-1</sup> ) | Micro. BET surface area (m <sup>2</sup> g <sup>-1</sup> ) | L/B  | Acid amount (mmol/g) |
|---------------------------------------------|------------------------------------------------------|----------------------------------------------------|-----------------------------------------------------------|-----------------------------------------------------------|------|----------------------|
| <i>Fe<sub>2</sub>O<sub>3</sub>@RS-28-C</i>  | 0.38                                                 | 422                                                | 90                                                        | 332                                                       | 77.9 | 0.71                 |
| <i>Fe<sub>2</sub>O<sub>3</sub>@RS-56-C</i>  | 0.37                                                 | 445                                                | 99                                                        | 346                                                       | 66.5 | 0.75                 |
| <i>Fe<sub>2</sub>O<sub>3</sub>@RS-112-C</i> | 0.41                                                 | 490                                                | 111                                                       | 379                                                       | 17.8 | 1.19                 |
| <i>Fe<sub>2</sub>O<sub>3</sub>@RS-140-C</i> | 0.40                                                 | 502                                                | 112                                                       | 390                                                       | 4.2  | 1.49                 |
| <i>Fe<sub>2</sub>O<sub>3</sub>@RS-160-C</i> | 0.41                                                 | 498                                                | 110                                                       | 388                                                       | 12.7 | 0.35                 |

<sup>a</sup> The BET surface area and pore volume are calculated based on the N<sub>2</sub> adsorption-desorption analysis; the acid amount is calculated based on the NH<sub>3</sub>-TPD analysis results; the L/B ratio was calculated based on the pyridine-IR analysis results.

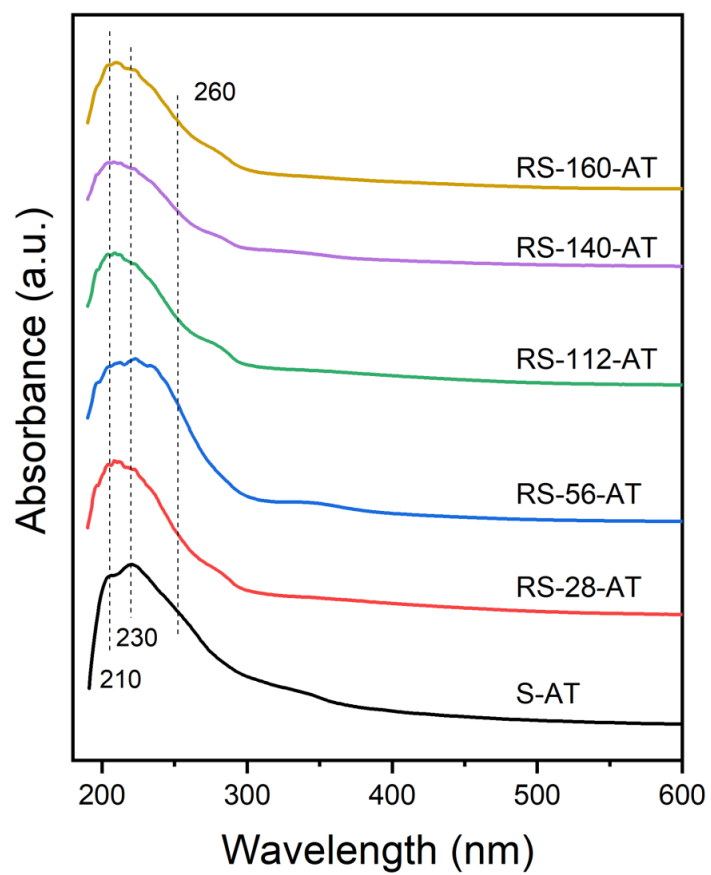

**Figure S1** UV-vis spectra of *RS*-series catalysts

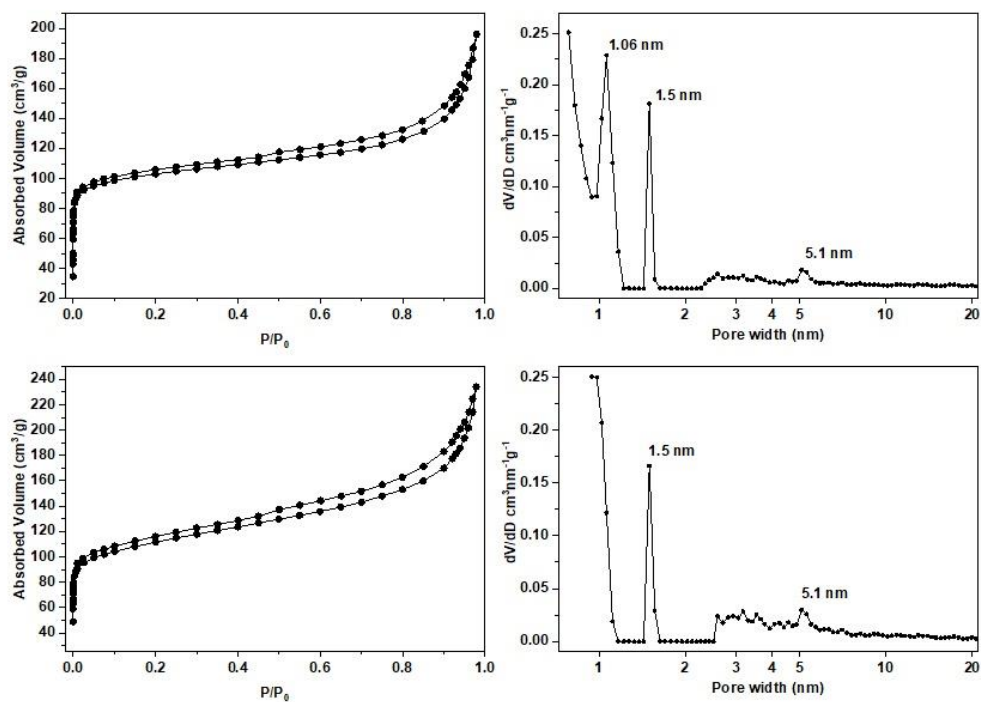

**Figure S2** N<sub>2</sub> adsorption-desorption isotherms and pore size distributions of zeolite catalysts *RS-140-AT* (top) and *RS-160-AT* (bottom).

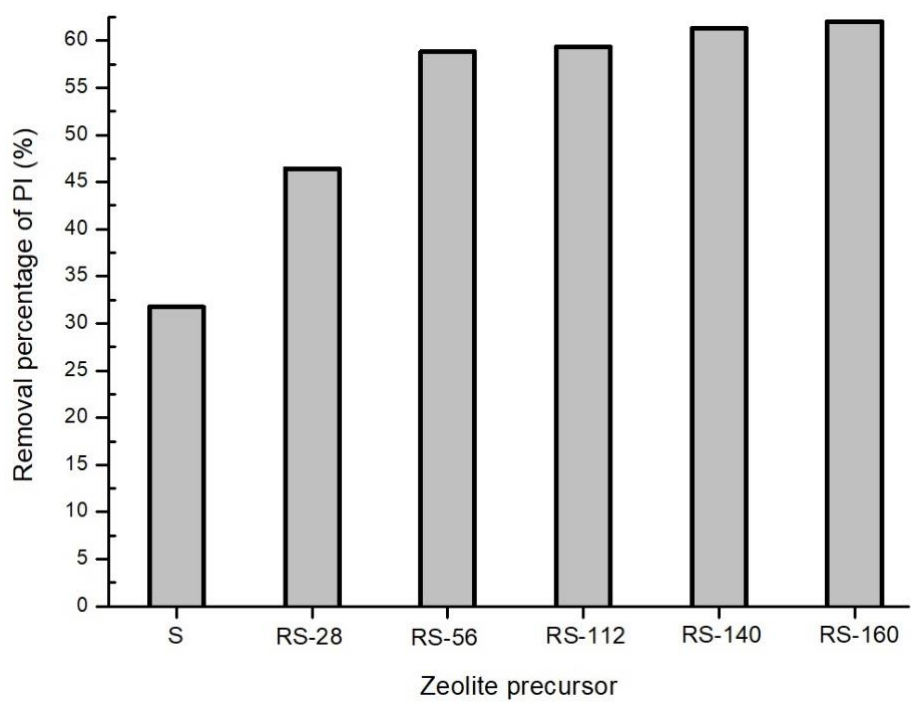

**Figure S3** Removal percentage of PI in zeolite precursor by acid treatment

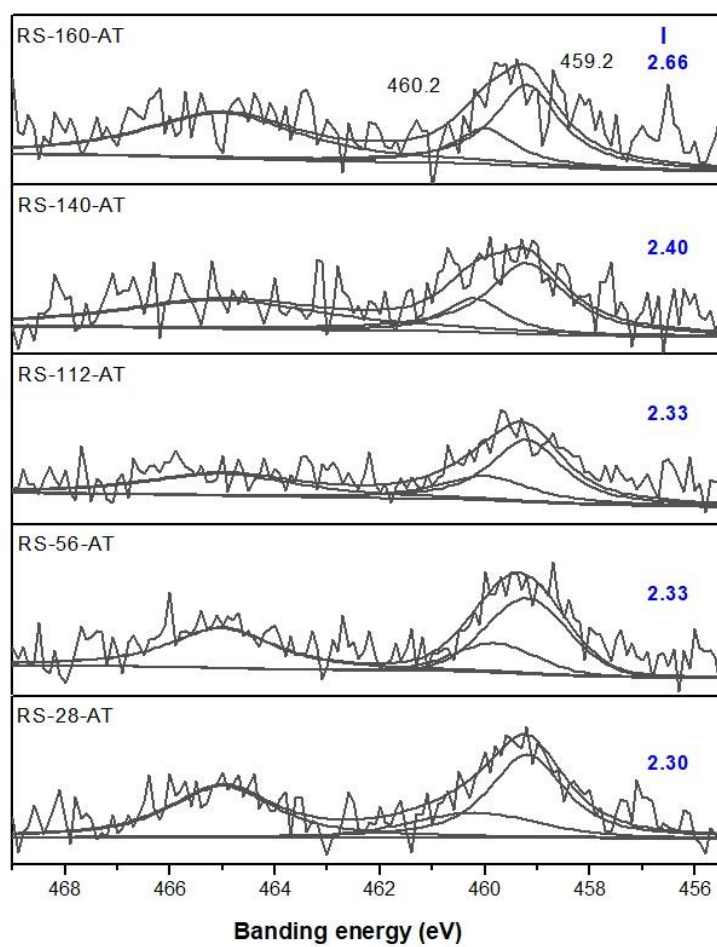

**Figure S4** XPS spectra of *RS*-series catalysts

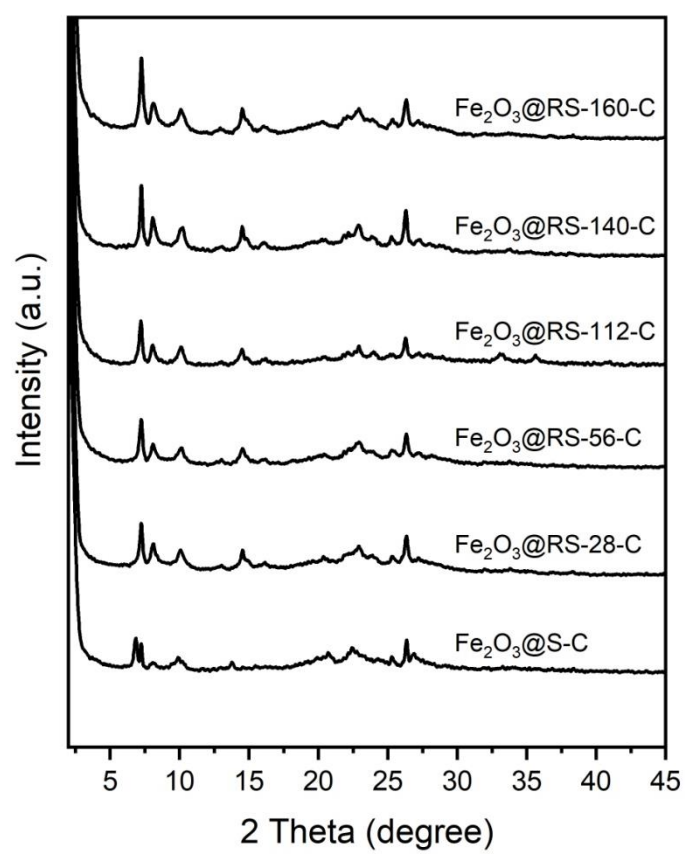

**Figure S5** XRD patterns of 28%Fe<sub>2</sub>O<sub>3</sub> supported zeolite catalysts



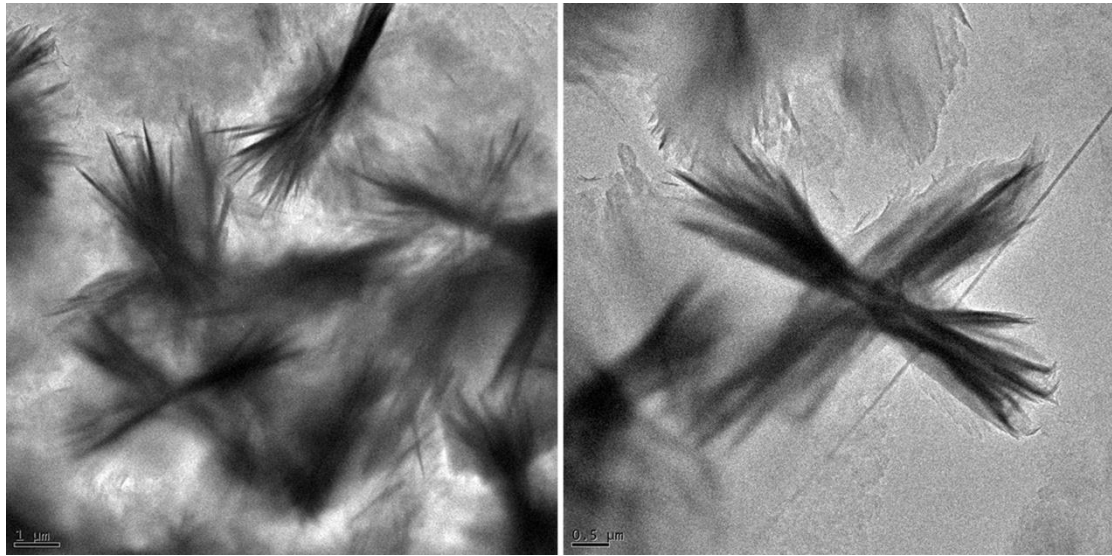

**Figure S6** HRTEM images of *RS-160* zeolite precursor.

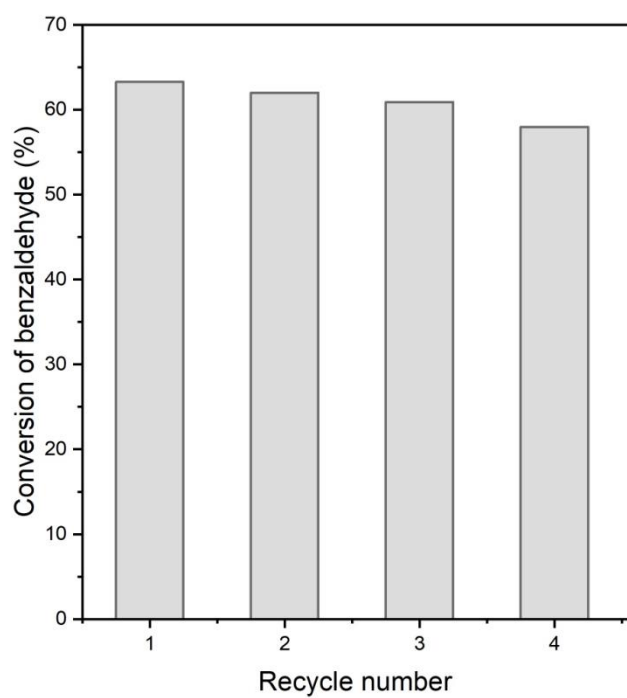

**Figure S7** Recycling test in the condensation of benzaldehyde with ethylene glycol over catalyst *RS-160-AT* (Reaction conditions: catalyst, 25 mg; cyclohexane, 6 ml; benzaldehyde, 5 mmol; ethylene glycol, 7.5 mmol; Temp., 363 K; time, 5 h)
